# Supplementary material
Source: bioRxiv or medRxiv preprint supplement (https://www.biorxiv.org/highwire/filestream/115769/field_highwire_adjunct_files/4/381525-5.pdf)
Supplement: Supplementary file [file 381525-5.pdf]

## SUPPLEMENTAL TABLE 4: ATF6 mRNA vs ALLC interactions

| Gene     | Log2 FC<br>ATF6<br>RNAseq | Log2 FC ATF6<br>ALLC Interactions |
|----------|---------------------------|-----------------------------------|
| PDIA4    | 3.35350768                | 1.172984512                       |
| DDOST    | 0.2900533                 | -0.236185642                      |
| TGOLN2   | -0.0955917                | -0.51073718                       |
| RPN2     | 0.10926026                | -0.149155437                      |
| UGGT1    | 0.61880318                | 0.019116067                       |
| ERLIN1   | -0.2576193                | -0.245894437                      |
| SRP72    | -0.1260351                | -0.056151433                      |
| GLT25D1  |                           | -0.201573981                      |
| SNRNP27  | -0.0496433                | -0.158499066                      |
| CCT6A    | -0.0168117                | -0.216377219                      |
| PLOD1    | -0.1883933                | -0.28856233                       |
| CRTAP    | -0.1753093                | 0.162406026                       |
| LEPRE1   | -0.0770311                | 0.000759105                       |
| DNAJC10  | 0.08539524                | 0.006355514                       |
| CPD      | -0.1035502                | -0.082314752                      |
| RCN1     | -0.1088372                | 0.009995943                       |
| PDIA3    | 1.11130302                | 0.267800287                       |
| CANX     | 0.70803811                | 0.071301062                       |
| PTPLAD1  | -0.170091                 | 0.119591514                       |
| GLG1     | -0.1336317                | -0.114662053                      |
| COL14A1  | 0.57149331                | 0.574712505                       |
| COCH     | -0.1329657                | -0.18650079                       |
| HSPA1L   | -0.0655699                | 0.469340093                       |
| ERP44    | 0.60267368                | 0.275873668                       |
| TFRC     | 0.01695613                | 0.064882152                       |
| TXNDC5   | -0.0640512                | 0.059416809                       |
| SRSF1    | 0.00286209                | 0.279240717                       |
| HYOU1    | 2.26292459                | 0.859325237                       |
| CKAP4    | 0.19932732                | -0.087154196                      |
| DYNC1H1  | -0.013268                 | 0.020220441                       |
| TMX1     | -0.0129521                | 0.019501296                       |
| HSP90B1  | 2.57619719                | 1.074676134                       |
| RPL34    | -0.042059                 | -0.39371735                       |
| PRKCSH   | -0.0806464                | 0.020424548                       |
| HSPA2    | -0.261163                 | -0.166393705                      |
| DNAJB11  | 1.97352634                | 0.677796001                       |
| ACLY     | -0.1036724                | 0.304693127                       |
| HSPA5    | 3.41036299                | 1.351947956                       |
| P4HA1    | -0.0684849                | -0.330993179                      |
| AHCY     | -0.1465966                | -0.155522703                      |
| GANAB    | -0.0702406                | -0.193875403                      |
| ERP29    | 0.03050764                | -0.514401753                      |
| CALU     | 0.14819135                | -0.094188069                      |
| FKBP10   | -0.0837783                | -0.5365252                        |
| PDIA6    | 1.00701252                | 0.391173667                       |
| PLOD3    | -0.3036373                | -0.08725862                       |
| PPIB     | 0.61203754                | 0.04496339                        |
| RCN2     | 0.39448641                | 0.362115776                       |
| LMAN1    | 0.10831485                | -0.048981333                      |
| NCLN     | -0.1381717                | -0.279313317                      |
| CNPY2    | 0.03975869                | -0.075045898                      |
| ERLIN2   | -0.3211897                | -0.302518073                      |
| SERPINH1 | -0.2148447                | -0.036929554                      |
| P4HB     | 0.84869477                | 0.278216333                       |
| TUBB2C   |                           | 0.06556539                        |
| TLN1     | -0.0802577                | -0.407307034                      |
| MANF     | 2.60038328                | 0.374994307                       |
| GOLM1    | -0.1091454                | -0.153610921                      |
| STT3A    | 0.13751671                | -0.236725573                      |
| ERO1L    | 0.28661199                | -0.06635032                       |
| RPN1     | 0.28901687                | 0.072736282                       |
| LGALS3BP | -0.0607711                | -0.096557623                      |
| MAN2A1   | 0.09850561                | 0.024935461                       |
| PDCD5    | -0.0390275                | 0.16507538                        |
| TUBA1A   | 0.01704267                | 0.326129993                       |
| CALR     | 1.63133316                | 0.512501424                       |
| DNAJC3   | 1.72241461                | 0.029389136                       |
| PRDX4    | -0.0846468                | -0.191809908                      |
| MOGS     | -0.016821                 | -0.447136551                      |
